# Supplementary material
Source: PubMed Central journal article supplement (PMC9853032)
Supplement: EIJ-D-22-00562_Yang_SD.pdf [file EIJ-D-22-00562_Yang_SD.pdf]

## Supplementary data

**Supplementary Table 1. The individual components of VOCCO.**

|                                                               | Number (%) |
|---------------------------------------------------------------|------------|
| Cardiac death                                                 | 6 (0.9)    |
| Vessel-related myocardial infarction                          | 5 (0.7)    |
| Vessel-related ischemia-driven revascularisation              | 25 (3.6)   |
| Acute coronary syndrome                                       | 2          |
| Abnormal functional test                                      |            |
| Low FFR                                                       | 14         |
| Abnormal non-invasive functional test                         | 5          |
| Recurrent angina with definite lesion progression of a lesion | 2          |
| Target lesion failure of stented segment                      | 2          |

FFR: fractional flow reserve; VOCCO: vessel-oriented composite outcome.

**Supplementary Table 2. Reclassification ability of individual and combination of quantitative and qualitative plaque characteristics in the medical treatment group.**

| Model              | NRI   | P-value | IDI   | P-value |
|--------------------|-------|---------|-------|---------|
| qn-HRP (reference) | NA    | NA      | NA    | NA      |
| qn-HRP + ql-HRP    | 0.437 | 0.027   | 0.014 | 0.017   |
| ql-HRP (reference) | NA    | NA      | NA    | NA      |
| ql-HRP + qn-HRP    | 0.487 | 0.019   | 0.018 | 0.018   |

qn-HRP:  $MLA < 3.3 \text{ mm}^2$  and plaque burden  $\geq 70.0\%$ , ql-HRP: low-attenuation plaque or positive remodelling.

FFR: fractional flow reserve; HRP: high-risk plaque; IDI: integrated discrimination improvement; MLA: minimum lumen area; NRI: net reclassification index; ql-HRP: qualitative HRP; qn-HRP: quantitative HRP

**Supplementary Table 3. The risk of VOCO in the PCI group relative to the medical treatment group according to FFR strata among lesions with qn-HRP and ql-HRP.**

| Adjusted variables                 | Lesions with qn-HRP and ql-HRP<br>& FFR 0.81 – 0.90 |         | Lesions with qn-HRP and ql-HRP<br>& FFR >0.90       |         |
|------------------------------------|-----------------------------------------------------|---------|-----------------------------------------------------|---------|
|                                    | HR (95% CI) of PCI group<br>(vs. medical treatment) | P-value | HR (95% CI) of PCI group<br>(vs. medical treatment) | P-value |
| Male                               | 0.17 (0.04 – 0.80)                                  | 0.025   | 0.68 (0.12 – 3.84)                                  | 0.665   |
| Hyperlipidemia                     | 0.17 (0.04 – 0.85)                                  | 0.030   | 0.51 (0.07 – 4.02)                                  | 0.525   |
| Acute coronary syndrome            | 0.16 (0.02 – 1.02)                                  | 0.053   | 0.64 (0.11 – 3.64)                                  | 0.616   |
| Use of aspirin                     | 0.18 (0.04 – 0.86)                                  | 0.032   | 0.58 (0.10 – 3.29)                                  | 0.538   |
| Use of P2Y <sub>12</sub> inhibitor | 0.14 (0.03 – 0.70)                                  | 0.017   | 0.47 (0.03 – 6.63)                                  | 0.574   |
| Use of statin                      | 0.19 (0.04 – 0.99)                                  | 0.049   | 0.57 (0.10 – 3.28)                                  | 0.533   |
| LAD                                | 0.23 (0.04 – 1.18)                                  | 0.079   | 1.11 (0.20 – 6.17)                                  | 0.903   |
| % diameter stenosis                | 0.13 (0.02 – 0.96)                                  | 0.045   | 0.37 (0.06 – 2.18)                                  | 0.270   |
| FFR                                | 0.18 (0.04 – 0.87)                                  | 0.033   | 0.68 (0.11 – 4.37)                                  | 0.683   |
| LAP volume                         | 0.21 (0.04 – 1.00)                                  | 0.050   | 0.62 (0.10 – 3.84)                                  | 0.606   |

Lesions with both qn-HRP and ql-HRP (n=138) were stratified into those with FFR of 0.81 – 0.90 (n=89) and FFR >0.90 (n=49).

qn-HRP: MLA<3.3 mm<sup>2</sup> and plaque burden ≥70.0%, ql-HRP: low-attenuation plaque or positive remodelling

CI: confidence interval; FFR: fractional flow reserve; HR: hazard ratio; HRP: high-risk plaque; LAD: left anterior descending artery; LAP: low-attenuation plaque; MLA: minimum lumen area; PCI: percutaneous coronary intervention; ql-HRP: qualitative HRP; qn-HRP: quantitative HRP; VOCO: vessel-oriented composite outcome.

**Supplementary Figure 1. ROC curve analysis for plaque burden and MLA in prediction of VOCO in the medical treatment group.**

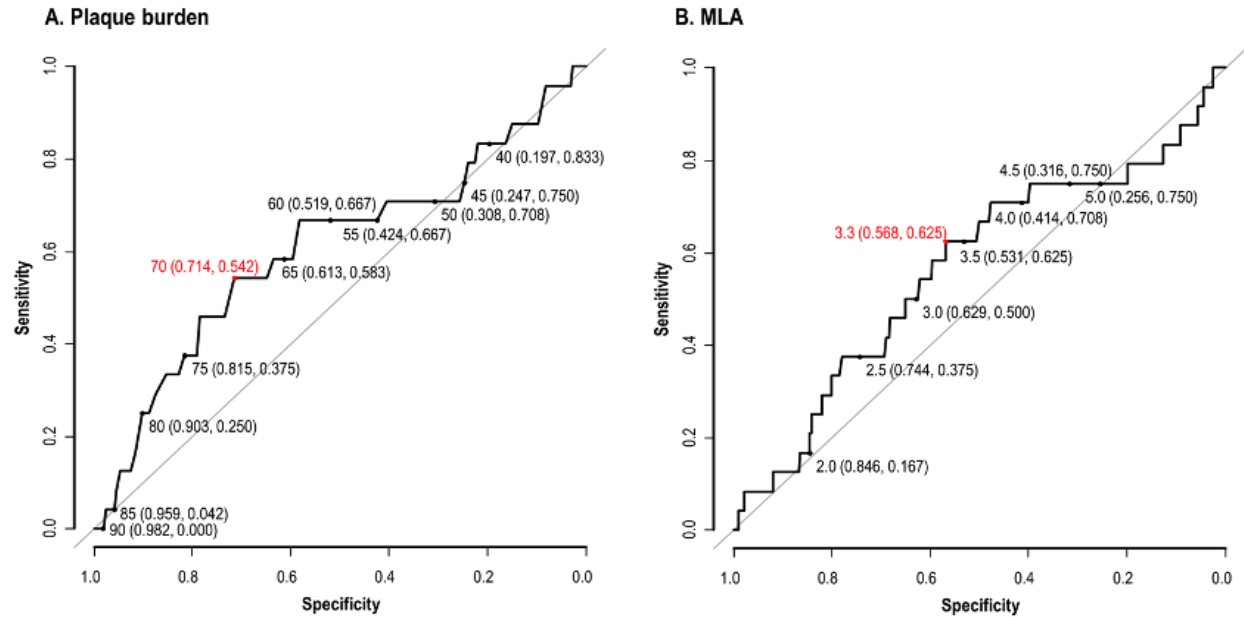

**Supplementary Figure 1. ROC curve analysis for plaque burden and MLA in prediction of VOCO in the medical treatment group**

In prediction of VOCO in the medical treatment group with FFR >0.80, the ROC curve analysis for plaque burden and MLA are presented. The optimal cut-off values derived from Youden's index for plaque burden and MLA were 70.0%, and 3.3 mm<sup>2</sup>, respectively.

MLA: minimum lumen area; ROC: receiver operating characteristic; VOCO: vessel-oriented composite outcomes.

**Supplementary Figure 2. Relative importance of quantitative and qualitative plaque measures for defining qn-HRP and ql-HRP in prediction of VOCO in the medical treatment group.**

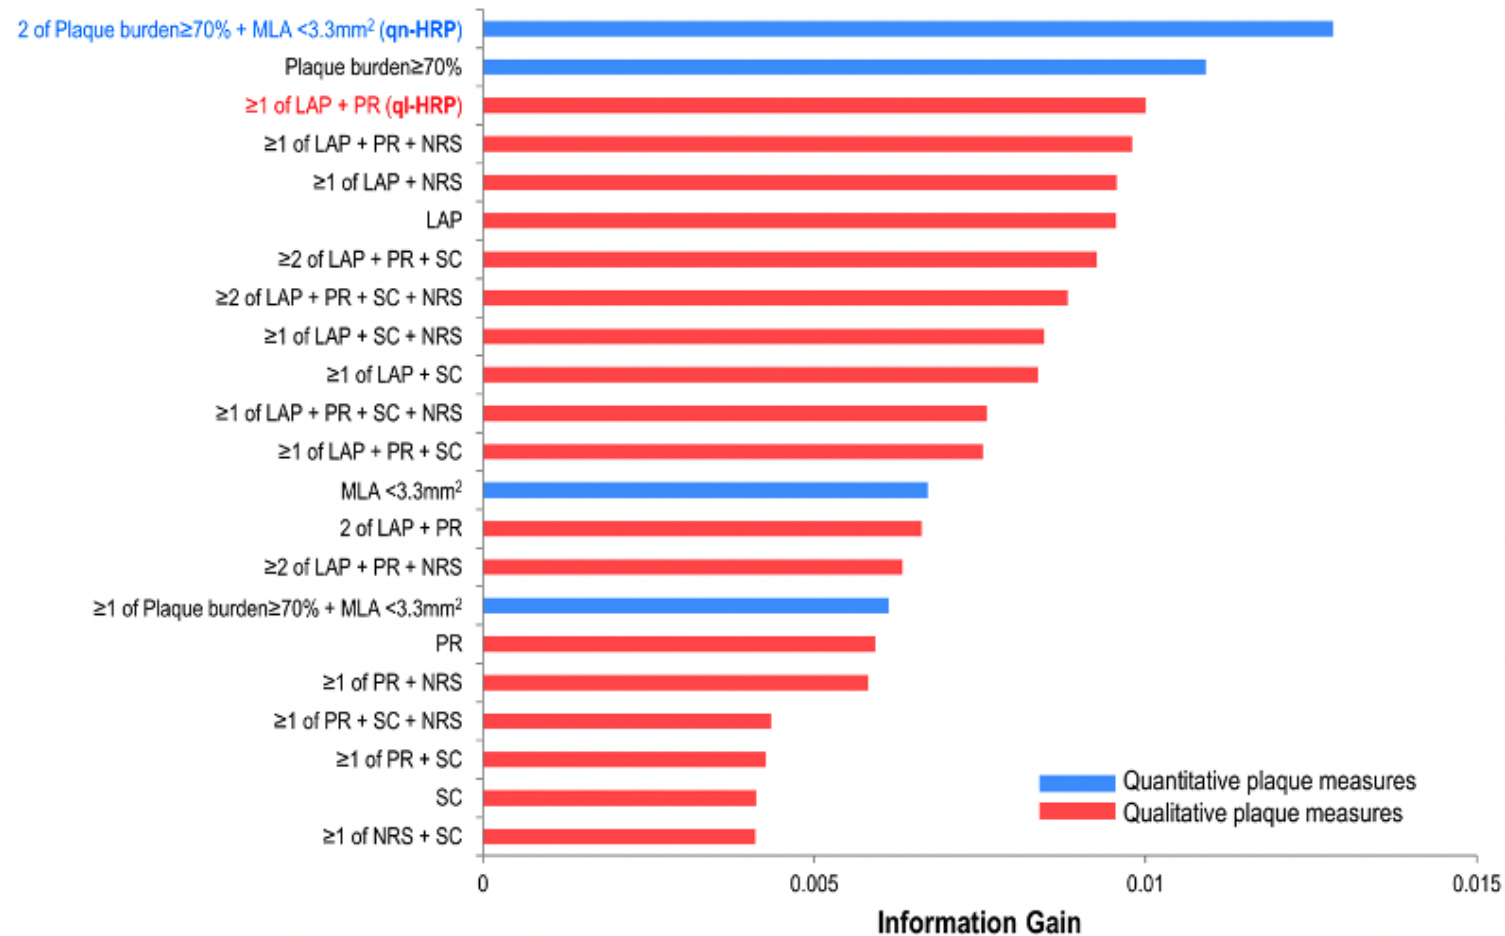

**Supplementary Figure 2.** Relative importance of quantitative and qualitative plaque measures for defining qn-HRP and ql-HRP in prediction of VOCCO in the medical treatment group.

The relative importance of possible combinations with quantitative plaque measure (i.e., plaque burden  $\geq 70\%$  and MLA  $< 3.3 \text{ mm}^2$ ) and qualitative plaque measure (i.e., LAP, PR, SC, and NRS) were compared according to the information criterion in the medical treatment group with FFR  $> 0.80$ . Among each category, 2 of plaque burden  $\geq 70\%$  + MLA  $< 3.3 \text{ mm}^2$  and  $\geq 1$  of LAP + PR showed the highest information gain and were defined as qn-HRP and ql-HRP, respectively. Of note, information gain was not available in the combinations of four of LAP + PR + SC + NRS,  $\geq 3$  of LAP + PR + SC + NRS, 3 of LAP + PR + SC, 3 of LAP + PR + NRS, 3 of LAP + SC + NRS,  $\geq 2$  of LAP + SC + NRS, 3 of PR + SC + NRS,  $\geq 2$  of PR + SC + NRS, 2 of LAP + NRS, 2 of LAP + SC, 2 of PR + NRS, 2 of PR + SC, 2 of SC + NRS, and NRS because of the small number of cases.

HRP: high-risk plaque; LAP: low-attenuation plaque; MLA: minimum lumen area; NRS: napkin-ring sign; ql-HRP: qualitative HRP; qn-HRP: quantitative HRP; PR: positive remodelling; SC: spotty calcification.

Supplementary Figure 3. Rates of VOCO according to HRP in the medical treatment group and the PCI group.

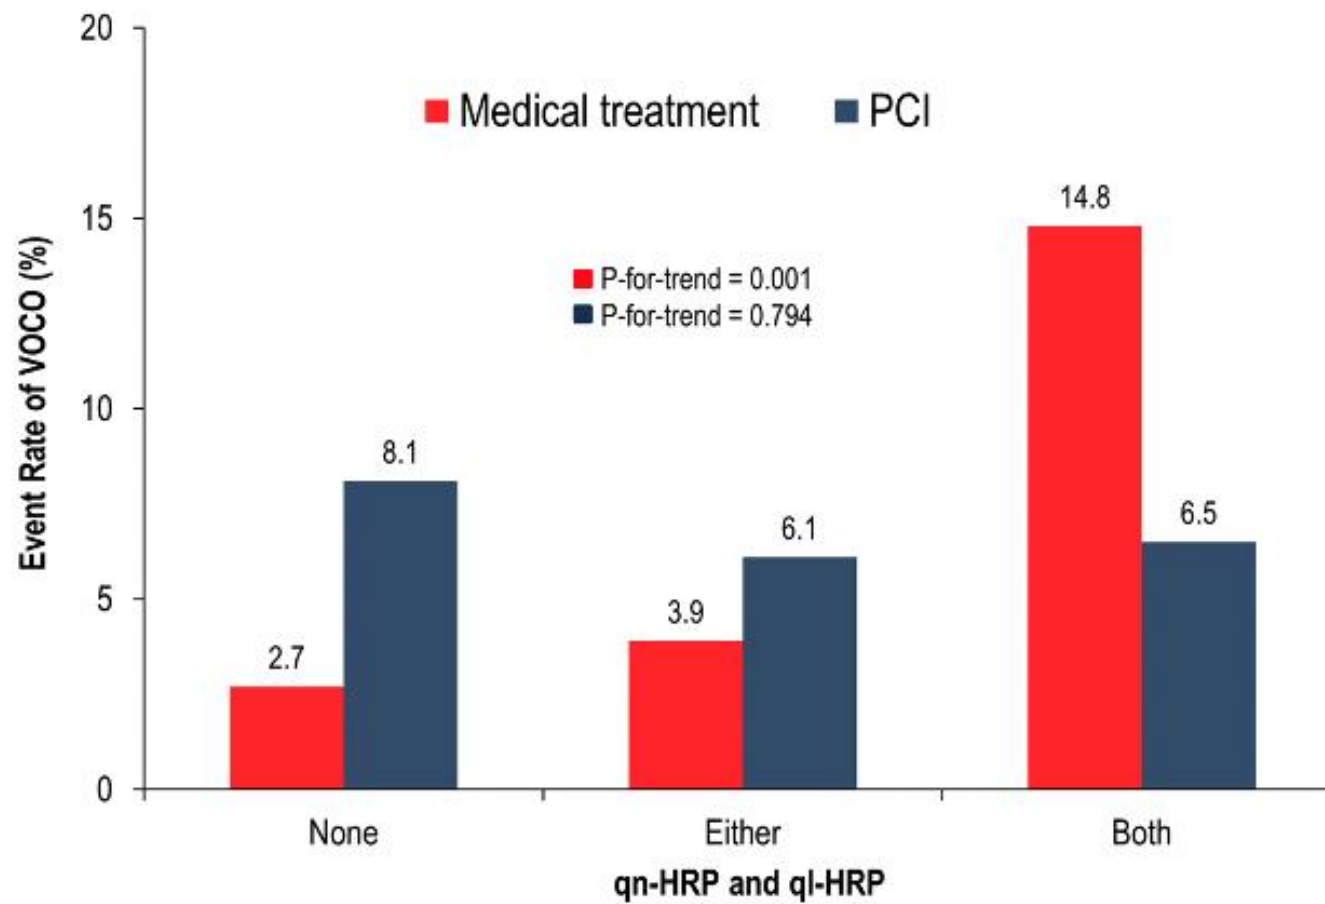

**Supplementary Figure 3.** Rates of VOCO according to HRP in the medical treatment group and the PCI group.

This analysis was done in the whole population (n=697). In the order of none, either, or both qn-HRP and ql-HRP, the event rate of VOCO increased in the medical treatment group, but there was no such trend in the PCI group.

The definitions of qn-HRP and ql-HRP are shown in Supplementary Figure 2.

HRP: high-risk plaque; PCI: percutaneous coronary intervention; ql-HRP: qualitative HRP; qn-HRP: quantitative HRP; VOCO: vessel-oriented composite outcomes.



**Supplementary Figure 4. Prognostic implications of qn-HRP and ql-HRP for lesion-oriented composite outcomes**

**A. Prognostic implications in medical treatment group**

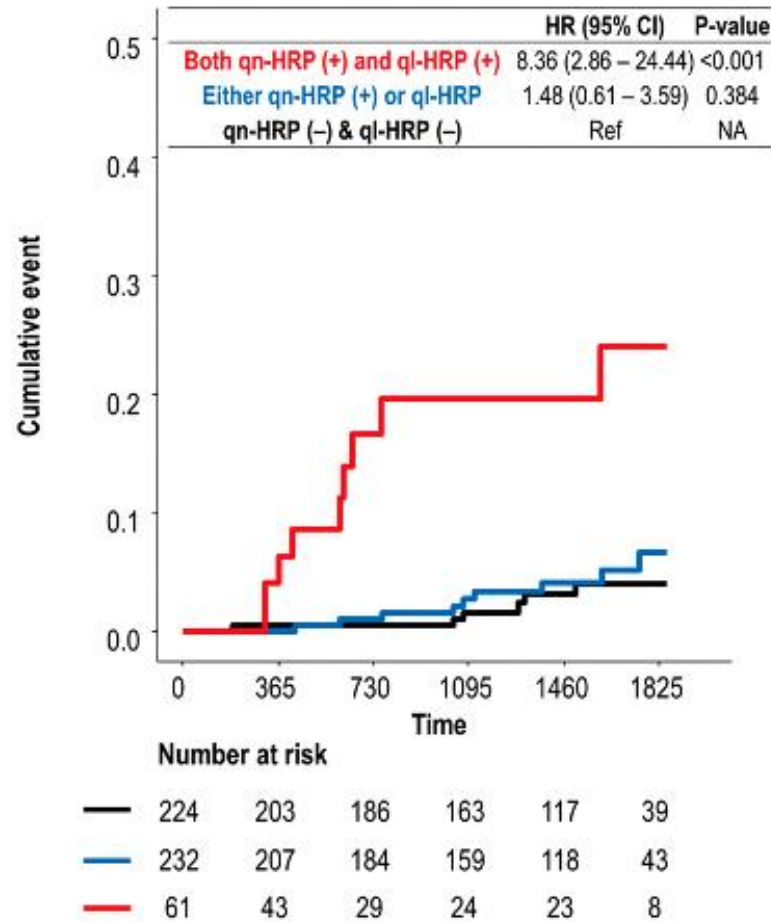

**B. Prognostic Interaction with treatment strategy and FFR**

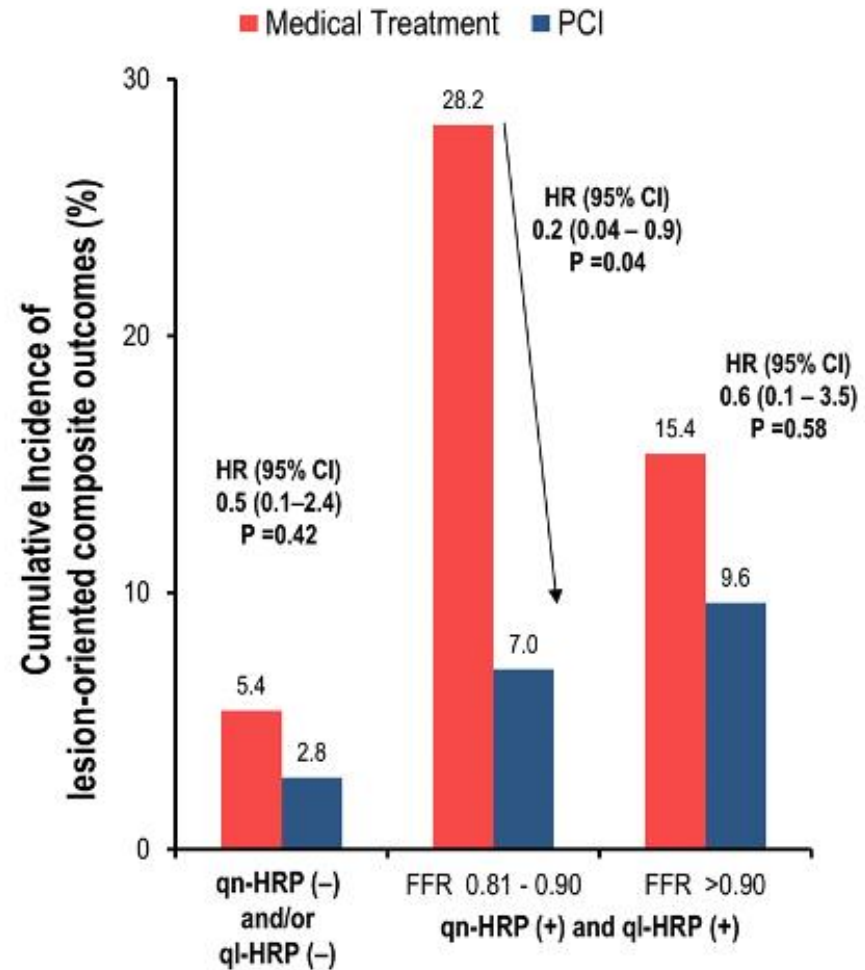

**Supplementary Figure 4.** Prognostic implications of qn-HRP and ql-HRP for lesion-oriented composite outcomes.

Prognostic implications of qn-HRP and ql-HRP were investigated for lesion-oriented composite outcomes (i.e., a composite of target lesion revascularisation, target vessel myocardial infarction, and cardiac death). (A) When lesions were divided according to qn-HRP and ql-HRP, the risk of lesion-oriented composite outcomes was the highest in lesions with both qn-HRP and ql-HRP in the medical treatment group. (B) When lesions were stratified by FFR strata, qn-HRP, and ql-HRP, the PCI group showed a lower risk for lesion-oriented composite outcomes than the medical treatment group in lesions with both qn-HRP and ql-HRP and FFR of 0.81–0.90.

The definitions of qn-HRP and ql-HRP are shown in Supplementary Figure 2.

CI: confidence interval; FFR: fractional flow reserve; HR: hazard ratio; HRP: high-risk plaque; PCI: percutaneous coronary intervention; ql-HRP: qualitative HRP; qn-HRP: quantitative HRP.

## Supplementary Figure 5. Prognostic implications of qn-HRP and ql-HRP for patient-oriented composite outcomes

### A. Prognostic implications in medical treatment group

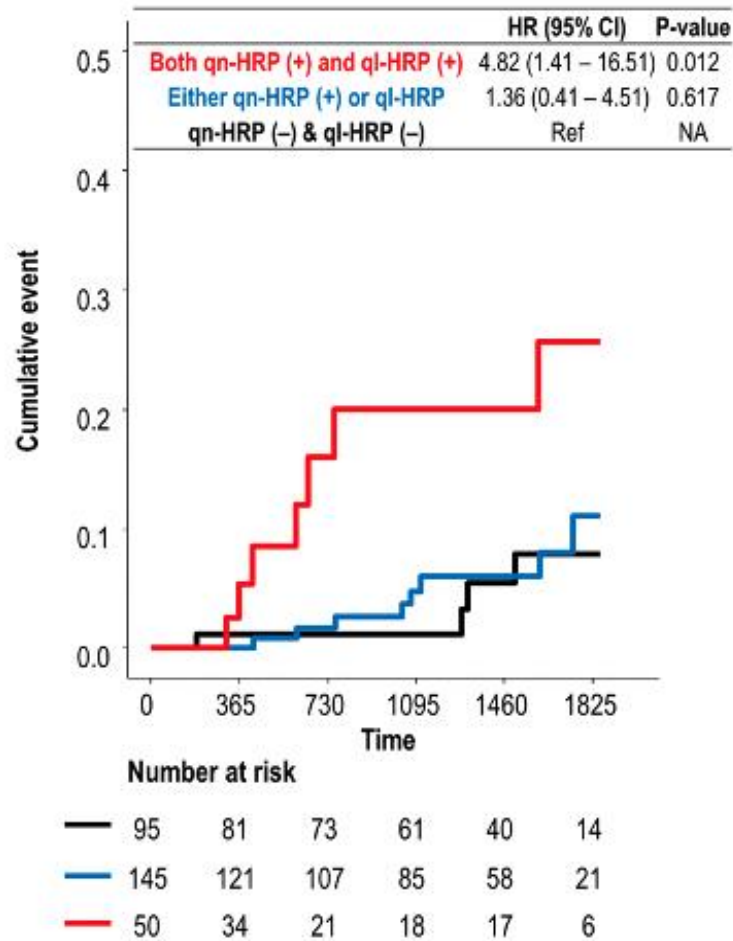

### B. Prognostic Interaction with treatment strategy and FFR

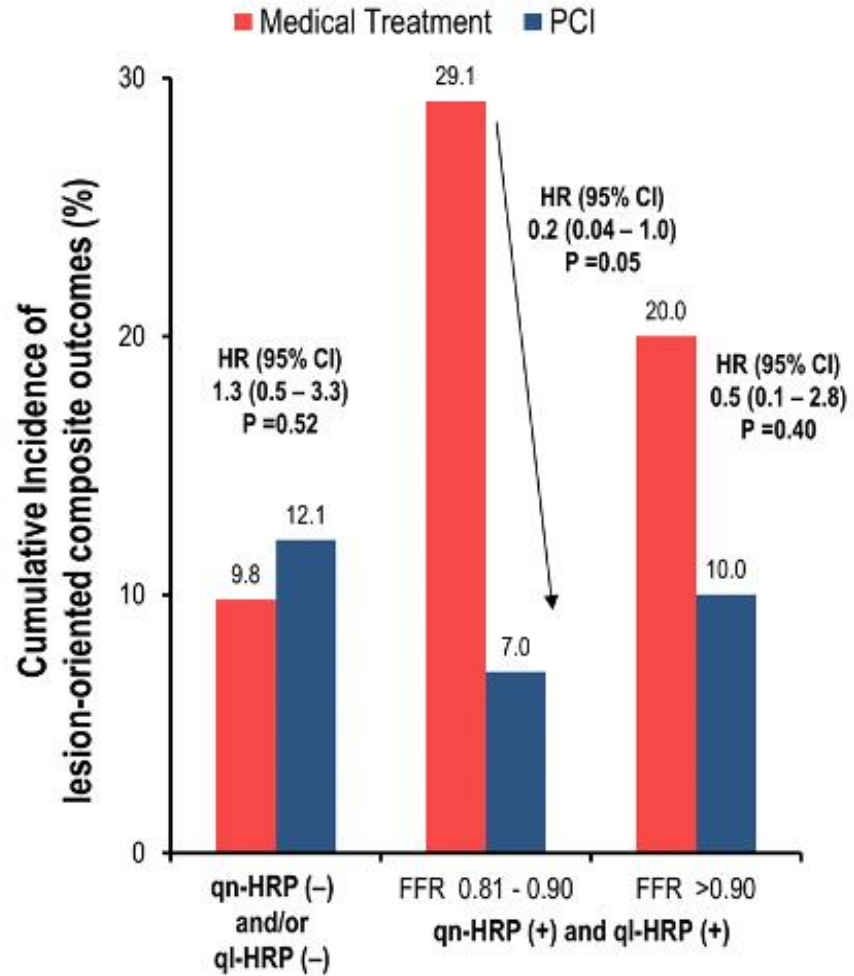

**Supplementary Figure 5.** Prognostic implications of qn-HRP and ql-HRP for patient-oriented composite outcomes.

This analysis was performed on a per-patient basis (n=458). In cases of multiple lesions in one patient, the representative lesion was designated following the hierarchy with the highest number of qn-HRP and ql-HRP, and low FFR. Prognostic implications of qn-HRP and ql-HRP were investigated for patient-oriented composite outcomes (i.e., a composite of target vessel revascularisation, target vessel myocardial infarction, and cardiac death). (A) When patients were divided according to qn-HRP and ql-HRP, the risk of patient-oriented composite outcomes was the highest in patients with both qn-HRP and ql-HRP in the medical treatment group. (B) As in the per-vessel analysis, the PCI group showed a lower risk for patient-oriented composite outcomes than the medical treatment group in patients with both qn-HRP and ql-HRP and FFR of 0.81–0.90.

The definitions of qn-HRP and ql-HRP are shown in Supplementary Figure 2.

CI: confidence interval; FFR: fractional flow reserve; HR: hazard ratio; HRP: high-risk plaque; PCI: percutaneous coronary intervention; ql-HRP: qualitative HRP; qn-HRP: quantitative HRP.
